# Supplementary material for: Co-Carriage of Metal and Antibiotic Resistance Genes in Sewage Associated Staphylococci
Source: MDPI journal article supplement (doi:10.3390/genes12101473), 2021-09-23
Supplement: s1 [file s1]

Table S1: Sediment sampling locations

| <b>Sample Location ID</b> | Sed-Stream-1                           | Sed-Stream-2                                   | Sed-Stream-3        | Sed-Stream-4                             |
|---------------------------|----------------------------------------|------------------------------------------------|---------------------|------------------------------------------|
| <b>Location</b>           | Small stream upstream of Veterans Park | West Hickman Creek (upstream of Veterans Park) | Veterans Park Creek | West Hickman Creek (downstream of WWTP*) |
| <b>Latitude</b>           | 37° 58' 49.92" N                       | 37° 58' 50.22" N                               | 37° 57' 29.08" N    | 37° 56' 4.61" N                          |
| <b>Longitude</b>          | 84° 29' 26.09" W                       | 84° 29' 25.15" W                               | 84° 30' 7.09" W     | 84° 30' 7.44" W                          |

\*Wastewater Treatment Plant
